# Supplementary material for: More than Just a Number: Perspectives from Black Male Participants on Community-Based Interventions and Clinical Trials to Address Cardiovascular Health Disparities
Source: MDPI journal article supplement (doi:10.3390/ijerph21040449), 2024-04-06
Supplement: s1 [file s1]

## **Focus Group Questions**

### **Enrollment in clinical trials**

1. How, if at all, did participation in the study change your view on clinical trials?
  - a. Gained more or less trust in clinical trials? Increased knowledge on clinical trial participation?
  - b. Impact of Black health coaches
2. What drew you into participating with this study?
  - a. Were the incentives persuasive?
3. How can we increase participation with surveys?
  - a. Participation with surveys would of changed if a session for just completing surveys was offered?
